# Supplementary material for: Pregnancy Induces an Immunological Memory Characterized by Maternal Immune Alterations Through Specific Genes Methylation
Source: Front Immunol. 2021 Jun 7;12:686676. doi: 10.3389/fimmu.2021.686676 (PMC8215664; doi:10.3389/fimmu.2021.686676)
Supplement: Supplementary file 5 [file Table_4.docx]

**Table S4. All DMGs in the PW and the PE group**

| **Groups** | **Hyper-methylated genes** | **Hypo-methylated genes** |
| --- | --- | --- |
| PE *vs.* NPW | FGF1 | RUNX1 |
| CASP7 | PITX2 |
| HIST1H4L | CLDN15 |
| UNC13A | NR2E1 |
| TRPV2 | SPP1 |
| OR6C70 | GNAQ |
| SSTR2 | RPL29 |
| OR10X1 | UBE2F |
| IST1 | RPL11 |
| TUBA1C | TNFSF13B |
| PANK3 | GSPT1 |
| OR1G1 | CA5A |
| AGTR1 | SLC8A1 |
| SNX2 | GNAS |
| ADCY10 | PISD |
| SIPA1L2 | NMD3 |
| GAL3ST1 | CABP1 |
| GAPDHS | PFKFB3 |
| SEC31B | KCNMB1 |
| CNTN1 | YWHAZ |
| DNAH5 | HTR3B |
| MOCS3 | DDX23 |
| PPARD | NUP160 |
| KCNE1 | MSH3 |
| GNG7 | DUSP6 |
| SCLY | WWP2 |
| LPP | CD7 |
| VPS26A | PPCDC |
| BPGM | PMAIP1 |
| PSMB5 | CCND3 |
| MRC1 | RPS26 |
| TRPM2 | FLT3 |
| GMDS | ATF1 |
| SF3A2 | SEMA5B |
| CYP3A43 | CDC23 |
| FXN | LNPEP |
| GRHPR | AHCY |
| AP3M2 | TK1 |
| TAB2 | TOB2 |
| GSR | CSF1R |
| CD6 | BTD |
| ABLIM1 | NFKBIZ |
| B3GAT2 | PLA2G12B |
| APC | UNC13C |
| GRAP2 | RGPD2 |
| MRPL28 | NCK1 |
| WEE1 | PRKG2 |
| ALG2 | AUH |
| AMBRA1 | ANGPT2 |
| RAB7A | APP |
| B3GALT1 |  |
| CHST4 |  |
| TPM4 |  |
| ECHS1 |  |
| GSTM2 |  |
| CADM1 |  |
|  |  |  |
| PW *vs.*NPW | SLC7A7 | PSMC5 |
| MET | URM1 |
| TFRC | SLC51A |
| HIST1H4K | GATM |
| PROCR | GNAS |
| BRK1 | ISYNA1 |
| FADS6 | FZD3 |
| MAN2C1 | IL21R |
| E2F5 | RAMP3 |
| NAGK | RAP1A |
| AMBRA1 | GAPDHS |
| USE1 | RPS16 |
| HYI | HMGCL |
| PAPSS1 | FYB1 |
| AKAP8L | SLC8A1 |
| CUL2 | PDE4A |
| APH1B | ATF6 |
| SFRP5 | SRSF1 |
| NUMB | CD247 |
| TFAP4 | UBE2L6 |
| PRICKLE2 | NUP160 |
| CAPZA2 | DEGS1 |
| PRPH | CLDN25 |
| MAN2A2 | HCAR3 |
| SLU7 | UGT1A5 |
| BCAT2 | GRAP2 |
| CYB5R3 | PIK3AP1 |
| UQCRFS1 | GNA15 |
| SETDB1 | GABRP |
| GEMIN4 | DNAJB1 |
| SF3B1 | CD86 |
| LYPLA1 | NANS |
| RGPD2 | NPBWR1 |
| AP1M1 | PMS2CL |
| IQSEC1 | NUP85 |
| SPTLC1 | ETS1 |
| GSTK1 | CNGB3 |
| ACKR1 | PPP2R2C |
|  | LBP |
|  | ERCC6 |
|  | PLA2R1 |
|  | GADD45B |
|  | TRIM71 |
|  | CLDN18 |
|  | LSM6 |
|  | CLDN10 |
|  | GANC |
|  | ACER2 |
|  | RPL13 |
|  | KCNJ8 |
|  | RANBP2 |
|  | BTRC |
|  | OR1L1 |
|  | ANK2 |
|  | SAT2 |
|  | MDN1 |
|  | SRSF3 |
|  | PGA3 |
|  | PILRA |
|  | SNX3 |
|  | DAGLA |
|  | SLCO1B3 |
|  | ESR1 |
|  | ACSF3 |
